# Supplementary material
Source: Springer Nature journal article supplement (https://www.springermedizin.de/resource/supplementary/12936_2008_600_MOESM1_ESM.pdf/9547796)

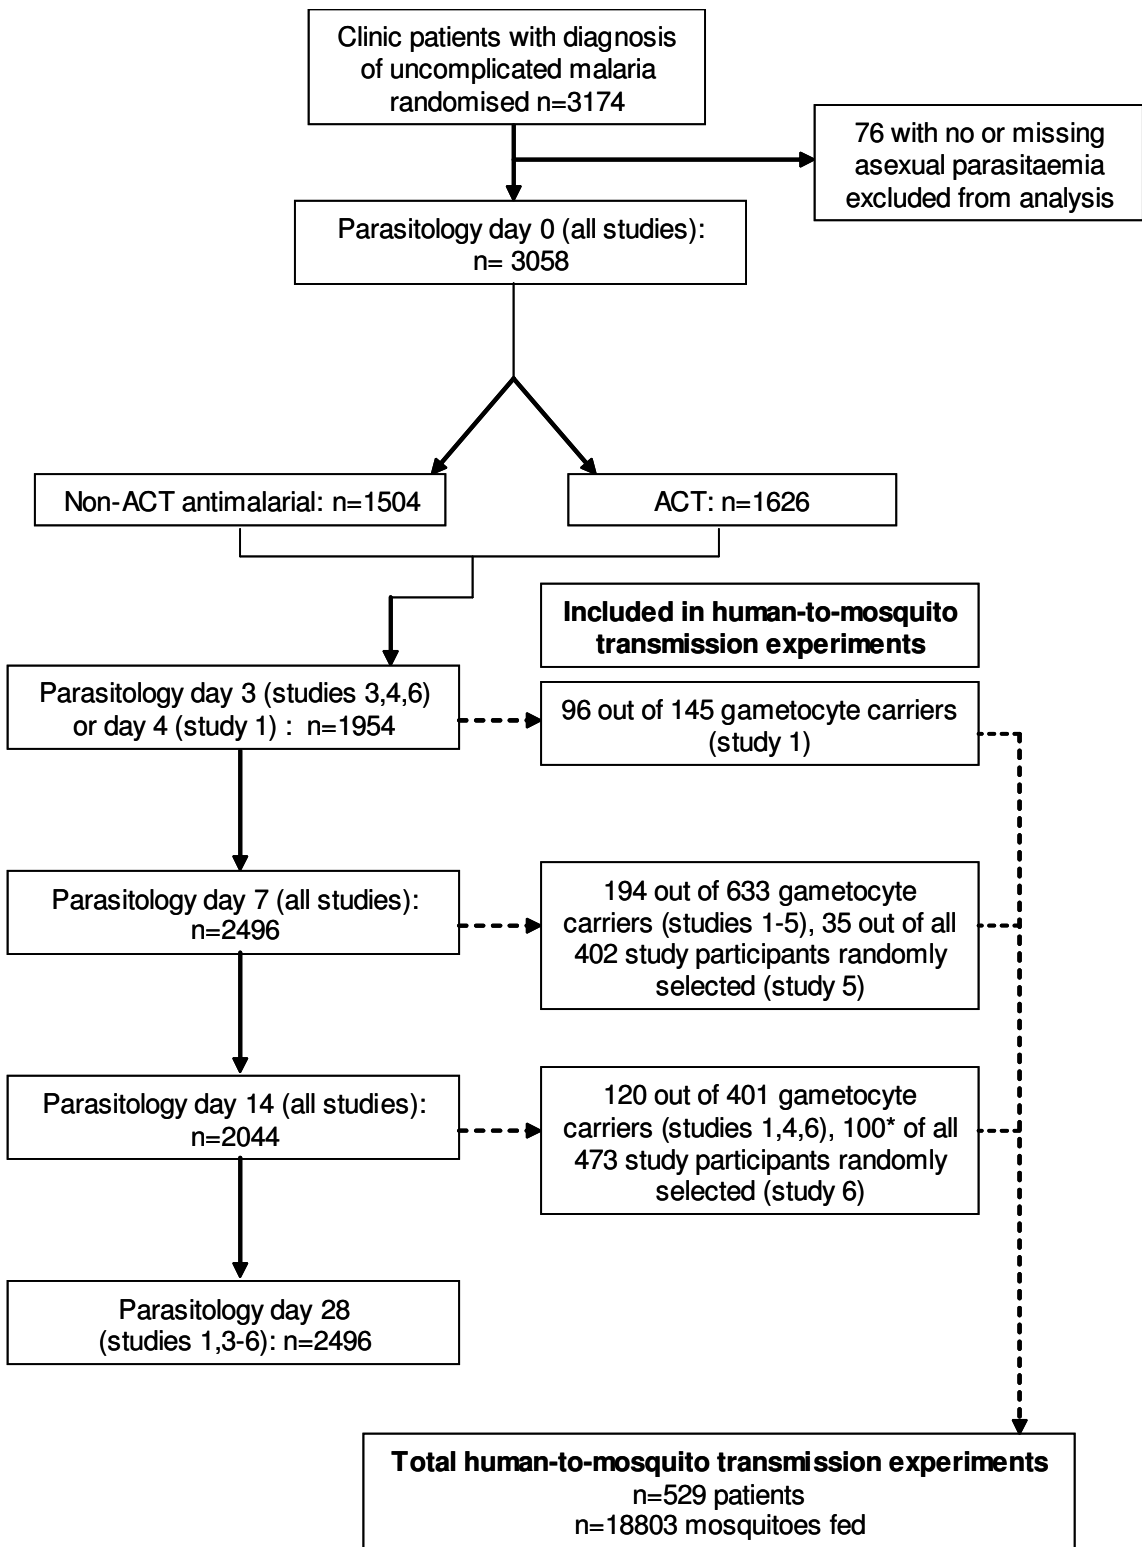

\*16 randomly selected patients were also slide-positive gametocyte carriers

Supplement: MOESM1 [file 9547796]
